# Supplementary material for: Melatonin improves the germination rate of cotton seeds under drought stress by opening pores in the seed coat
Source: PeerJ. 2020 Jul 6;8:e9450. doi: 10.7717/peerj.9450 (PMC7346864; doi:10.7717/peerj.9450)
Supplement: Supplemental Information 1 [file peerj-08-9450-s001.xlsx]

## Sheet: cumulative germination number
					0% PEG-6000							5% PEG-6000
		germination time/d	0% -1	0% -2	0% -3	0% -4	0% -5	AVE	SD		germination time/d		5%-1	5%-2	5%-3	5%-4	5%-5	AVE	SD
		1	15	14	16	15	14	14.8	0.83666		1		12	14	12	13	11	12.4	1.14018
		2	29	30	28	31	30	29.6	1.14018		2		25	26	24	26	24	25	1
		3	42	41	40	42	40	41	1		3		41	39	39	40	38	39.4	1.14018
		4	44	45	44	46	45	44.8	0.83666		4		42	42	41	42	40	41.4	0.894427
		5	45	46	46	47	46	46	0.707107		5		43	46	43	45	43	44	1.41421
		6	48	47	46	48	47	47.2	0.83666		6		44	48	45	46	44	45.4	1.67332
		7	48	47	47	48	48	47.6	0.547723		7		45	48	45	47	45	46	1.41421
		germination rate/%	96	94	94	96	96	95.2	1.09545		germination rate/%		90	96	90	94	90	92	2.82843
					10% PEG-6000							15% PEG-6000
		germination time/d	10%-1	10%-2	10%-3	10%-4	10%-5	AVE	SD		germination time/d		15%-1	15%-2	15%-3	15%-4	15%-5	AVE	SD
		1	9	10	10	9	10	9.6	0.547723		1		7	6	7	6	6	6.4	0.547723
		2	22	20	19	19	22	20.4	1.51658		2		15	14	17	15	17	15.6	1.34164
		3	31	28	29	28	31	29.4	1.51658		3		22	25	23	23	25	23.6	1.34164
		4	35	34	35	34	35	34.6	0.547723		4		28	27	27	27	28	27.4	0.547723
		5	37	36	36	36	36	36.2	0.447214		5		29	28	29	28	28	28.4	0.547723
		6	38	38	37	37	37	37.4	0.547723		6		30	28	30	29	31	29.6	1.14018
		7	38	39	37	39	37	38	1		7		31	28	30	28	31	29.6	1.51658
		germination rate/%	76	78	74	78	74	76	2		germination rate/%		62	56	60	56	62	59.2	3.03315
					20% PEG-6000
		germination time/d	20%-1	20%-2	20%-3	20%-4	20%-5	AVE	SD
		1	2	4	2	2	3	2.6	0.894427
		2	6	8	6	8	5	6.6	1.34164
		3	9	11	9	8	11	9.6	1.34164
		4	13	15	13	12	14	13.4	1.14018
		5	17	19	16	16	19	17.4	1.51658
		6	19	22	18	18	22	19.8	2.04939
		7	20	22	19	19	22	20.4	1.51658
		germination rate/%	40	44	38	38	44	40.8	3.03315
		Explanation：In these tables，X% PEG600-N（“X”=0，5，10，15，20，“N”=1，2，3，4，5） means we did five repeated germination tests at a concentration of 0，5，10，15，20% of PEG-6000. Finally, five repeated averages were obtained as the final result. These tables show the germination number of seeds under different concentrations of PEG stress (50 cotton seeds are placed in each Petri dish), to measure seed germin…

## Sheet: MTcumulative germination number
						0 MT										10 MT
		germination time/d		0MT-1	0MT-2	0MT-3	0MT-4	0MT-5	AVE	SD		germination time/d		10MT-1	10MT-2	10MT-3	10MT-4	10MT-5	AVE	SD
		1		4	4	7	5	5	5	1.22474		1		5	4	5	7	5	5.2	1.09545
		2		11	12	15	14	13	13	1.58114		2		10	11	11	13	12	11.4	1.14018
		3		22	22	23	22	22	22.2	0.447214		3		23	21	20	23	21	21.6	1.34164
		4		26	28	27	29	27	27.4	1.14018		4		29	29	30	29	31	29.6	0.894427
		5		31	33	30	34	32	32	1.58114		5		35	33	35	33	34	34	1
		6		35	36	34	35	35	35	0.707107		6		37	38	37	38	37	37.4	0.547723
		7		35	37	34	38	37	36.2	1.64317		7		38	38	37	38	39	38	0.707107
		germination rate		70	74	68	76	74	72	3.65148		germination rate		76	76	74	76	78	76	1.41421
		germination potential		44	44	46	44	44	44.5	1		germination potential		46	42	40	46	42	43.2	2.68328
		radical length		6.3	6.5	6.1	6.4	6.2	6.3	0.158114		radical length		6.1	6.2	6	6.3	6.15	6.15	0.111803
		fresh weight		11.47	10.31	10.98	12.72	11.97	11.495	1.06391		fresh weight		12.93	15.19	13.84	14.05	13.17	13.836	0.886499
						50 MT									100 MT
		germination time/d		50MT-1	50MT-2	50MT-3	50MT-4	50MT-5	AVE	SD		germination time/d		100MT-1	100MT-2	100MT-3	100MT-4	100MT-5	AVE	SD
		1		5	3	4	3	3	3.6	0.8		1		7	8	7	9	7	7.75	0.957427
		2		13	9	8	7	7	8.8	2.22711		2		15	15	14	14	15	14.5	0.57735
		3		22	22	23	21	20	21.6	1.0198		3		25	24	25	23	25	24.25	0.957427
		4		28	28	29	27	25	27.4	1.35647		4		27	30	28	29	27	28.5	1.29099
		5		35	34	31	34	33	33.4	1.35647		5		32	35	32	34	32	33.25	1.5
		6		37	34	36	36	37	36	1.09545		6		37	40	38	38	37	38.25	1.25831
		7		38	36	37	36	38	37	0.894427		7		39	41	39	40	39	39.75	0.957427
		germination rate		73	72	74	72	76	73.5	1.91485		germination rate		78	82	78	80	78	79.5	1.91485
		germination potential		44	44	46	42	40	43.2	2.28035		germination potential		50	48	50	46	50	48.5	1.91485
		radical length		6.5	6.6	6.5	6.7	6.6	6.6	0.083666		radical length		6.7	6.9	7	6.5	6.8	6.78	0.192354
		fresh weight		12.39	13.06	13.35	13.54	14.28	13.324	0.689804		fresh weight		16.53	18.25	18.56	17.18	17.63	17.63	0.941948
						200 MT									500 MT
		germination time/d		200MT-1	200MT-2	200MT-3	200MT-4	200MT-5	AVE	SD		germination time/d		500MT-1	500MT-2	500MT-3	500MT-4	500MT-5	AVE	STD
		1		3	2	2	4	3	2.8	0.83666		1		2	2	1	2	3	2	0.816497
		2		8	8	6	9	6	7.4	1.34164		2		6	5	5	7	7	6	1.1547
		3		17	16	17	18	15	16.6	1.14018		3		13	14	13	15	16	14.5	1.29099
		4		23	22	23	24	21	22.6	1.14018		4		18	19	18	18	20	18.75	0.957427
		5		29	27	26	28	26	27.2	1.30384		5		22	22	22	21	22	21.75	0.5
		6		32	31	30	31	30	30.8	0.83666		6		24	25	25	24	24	24.5	0.57735
		7		32	32	31	31	32	31.6	0.547723		7		25	25	25	26	25	25.25	0.5
		germination rate		64	64	62	62	64	63.2	1.09545		germination rate		50	50	50	52	50	50.5	1
		germination potential		34	32	34	36	30	33.2	2.28035		germination potential		26	28	26	30	32	28.4	2.60768
		radical length		5	4.9	4.9	5	5.2	5	0.122474		radical length		2	2.2	2.5	2.8	2.8	2.46	0.357771
		fresh weight		14.21	14.8	13.16	15.51	13.37	14.21	0.980587		fresh weight		13.71	14.05	12.43	14.4	13.99	13.716	0.877169
		Explanation：In these tables，XMT-N（“MT” =melatonin；“X”=0，10，50，100，200，500；“N”=1，2，3，4，5） means we did five repeated germination tests at a concentration of 0，10，50，100，200，500μM of melatonin. Finally, five repeated averages were obtained as the final result. These tables show the germination number of seeds treated with different concentrations of melatonin under drought stress (50 cotton seeds a…
					W									W+DS
		germination time/d		W-1	W-2	W-3	W-4	W-5	AVE	SD		germination time/d		W+DS-1	W+DS-2	W+DS-3	W+DS-4	W+DS-5	AVE	SD
		1		7	5	8	5	6	6.2	1.5		1		4	4	7	5	6	5.2	1.30384
		2		18	15	20	17	16	17.5	2.08167		2		11	12	15	14	13	13	1.58114
		3		26	26	25	26	26	25.75	0.5		3		22	22	23	22	22	22.2	0.447214
		4		33	37	37	31	32	34.5	3		4		26	28	27	29	27	27.4	1.14018
		5		40	41	43	38	39	40.5	2.08167		5		31	33	30	34	32	32	1.58114
		6		43	44	45	43	42	43.75	0.957427		6		35	36	34	35	35	35	0.707107
		7		45	45	45	46	45	45.25	0.5		7		35	37	34	38	36	36	1.58114
		germination rate		90	90	90	92	88	90	1		germination rate		70	74	68	77	72	72.25	4.03113
		germination potential		52	52	50	52	52	51.5	1		germination potential		44	44	46	44	44	44.5	1
		germination index		19.1024	17.8595	20.2	17.9119	16.3825	18.2913	1.11365		germination index		14.4762	15.9929	15.5119	15.5119	15.3742	15.3732	0.639552
		vigour index		143.65	134.304	151.904	134.698	138.378	137.55	5.28604		vigour index		143.65	134.304	151.904	134.698	143.367	103.437	1.83267
					MT										MT+DS
		germination time/d		MT-1	MT-2	MT-3	MT-4	MT-5	AVE	SD		germination time/d		MT+DS-1	MT+DS-2	MT+DS-3	MT+DS-4	MT+DS-5	AVE	SD
		1		9	10	7	8	9	8.6	1.14018		1		7	8	7	9	8	7.8	0.83666
		2		16	18	15	18	15	16.4	1.51658		2		15	15	14	14	15	14.6	0.547723
		3		26	27	26	26	27	26.4	0.547723		3		25	24	25	23	24	24.2	0.83666
		4		30	32	31	30	32	31	1		4		27	30	28	29	28	28.4	1.14018
		5		35	39	40	38	38	38	1.87083		5		32	35	32	34	33	33.2	1.30384
		6		41	42	44	42	43	42.3333	1.14018		6		37	40	38	38	38	38.2	1.09545
		7		43	44	45	45	44	44.2	0.83666		7		39	41	39	40	39	39.6	0.894427
		germination rate		86	88	89	90	87.6667	87.6667	1.52753		germination rate		78	82	78	80	78	79.3333	2.31
		germination potential		52	54	52	52	54	52.6667	0.58		germination potential		50	48	50	46	48	48.5	0.57
		germination index		19.119	20.4357	18.5262	19.3379	19.3827	19.3603	0.977358		germination index		16.9524	17.9762	16.8595	17.9524	17.4351	17.4351	0.612281
		vigour index		120.45	128.745	116.715	126.958	116.982	121.97	6.15736		vigour index		117.989	125.114	117.342	124.949	115.148	120.148	4.31272
		Explanation：In these tables，W, W+DS, MT, MT+DS-N（W=0μM MT+0% PEG-6000, W+DS=0μM MT+10%PEG-6000, MT=100μM MT+0% PEG-6000, MT+DS=100μM MT+10% PEG-6000, “N”=1，2，3，4，5） means we pre-soaked seeds with water or 100μM MT and to germinate under normal or 10% PEG stress and we did five repeated germination tests. Finally, five repeated averages were obtained as the final result. These tables show the germ…

## Sheet: SOD
				germination time/d		different treatments
				2	Repetitions	W	W+DS	MT	MT+DS
					1	329.687	304.98	336.584	329.687
					2	336.584	313.02	347.188	322.924
					3	338.329	306.573	354.435	324.602
					AVE	334.867	308.191	346.069	325.738
					SD	4.56983	4.25695	8.97815	3.5218
				4	Repetitions	W	W+DS	MT	MT+DS
					1	605.885	573.773	602.576	586.361
					2	589.561	549.565	619.351	570.678
					3	564.547	546.626	583.183	561.512
					AVE	586.664	556.655	601.703	572.85
					SD	20.8208	14.8975	18.0997	12.5663
				6	Repetitions	W	W+DS	MT	MT+DS
					1	371.29	350.793	409.581	382.969
					2	403.274	345.398	411.706	369.379
					3	390.962	359.968	418.151	367.477
					AVE	388.509	352.053	413.146	373.275
					SD	16.1324	7.36606	4.46304	8.44909
				Explanation：This table is the raw data of SOD activity determination. We set up three repetitions in each experiment to ensure the reliability of the results, and finally take the average as the final result.

## Sheet: POD
					germination time/d		different treatments
					2	Repetitions	W	W+DS	MT	MT+DS
						1	14.1105	14.116	22.2778	17.1095
						2	14.997	10.3424	21.3889	16.4251
						3	14.0366	13.7666	19.0556	15.4992
						AVE	14.3814	12.7417	20.9074	16.3446
						SD	0.53444	2.08515	1.6642	0.808167
					4	Repetitions	W	W+DS	MT	MT+DS
						1	26.6739	26.816	37.5111	34.7262
						2	28.1608	26.2992	39.2	36.2526
						3	28.8366	25.0359	39.3778	35.4894
						AVE	27.8904	26.0503	38.6963	35.4894
						SD	1.10643	0.915753	1.03024	0.763213
					6	Repetitions	W	W+DS	MT	MT+DS
						1	33.9591	26.8692	39.7554	25.6016
						2	33.1197	26.0903	40.126	26.7836
						3	32.5855	24.6625	37.6239	25.6725
						AVE	33.2214	25.874	39.1684	26.0193
						SD	0.692443	1.11912	1.35035	0.662908
				Explanation：This table is the raw data of POD activity determination. We set up three repetitions in each experiment to ensure the reliability of the results, and finally take the average as the final result.

## Sheet: O2-
					germination time/d		different treatments
					2	Repetitions	W	W+DS	MT	MT+DS
						1	164	253.256	102.512	213.586
						2	166.975	226.479	88.6279	232.429
						3	172.925	245.322	95.57	234.413
						AVE	167.967	241.685	95.57	226.809
						SD	4.54469	13.7538	6.94213	11.4944
					4	Repetitions	W	W+DS	MT	MT+DS
						1	223.504	283.008	208.628	259.206
						2	203.669	282.016	219.537	266.148
						3	224.495	280.032	221.52	262.181
						AVE	217.223	281.685	216.562	262.512
						SD	11.7483	1.5149	6.94213	3.48285
					6	Repetitions	W	W+DS	MT	MT+DS
						1	272.099	357.388	255.239	348.462
						2	265.156	365.322	246.314	352.429
						3	274.082	366.313	244.33	357.388
						AVE	270.446	363.007	248.628	352.76
						SD	4.68675	4.8921	5.81103	4.47197
					Explanation：This table is the raw data of superoxide anion content determination. We set up three repetitions in each experiment to ensure the reliability of the results, and finally take the average as the final result.

## Sheet: H2O2
					germination time/d		different treatments
					2	Repetitions	W	W+DS	MT	MT+DS
						1	84.309	103.166	63.4004	63.255
						2	85.1342	101.605	63.7107	63.255
						3	85.5468	101.215	65.5723	63.4798
						AVE	84.9967	101.995	64.2278	63.3299
						SD	0.630265	1.03261	1.1747	0.129811
					4	Repetitions	W	W+DS	MT	MT+DS
						1	92.6143	98.4785	85.7501	95.0405
						2	90.3415	98.8405	87.992	95.4416
						3	90.0574	97.3923	87.4315	95.8426
						AVE	91.0044	98.2371	87.0579	95.4416
						SD	1.4014	0.753674	1.16669	0.401015
					6	Repetitions	W	W+DS	MT	MT+DS
						1	119.81	126.447	82.9703	88.4934
						2	122.215	126.856	81.8017	87.3873
						3	123.659	126.038	85.3075	88.4934
						AVE	121.895	126.447	83.3598	88.1247
						SD	1.9446	0.409213	1.78506	0.638646
					Explanation：This table is the raw data of hydrogen peroxide content determination. We set up three repetitions in each experiment to ensure the reliability of the results, and finally take the average as the final result.

## Sheet: MDA
						germination time/d		different treatments
						2	Repetitions	W	W+DS	MT	MT+DS
							1	4.07515	5.37634	3.06452	3.62319
							2	5.36205	4.56482	3.54839	3.331
							3	4.28964	4.97058	3.3871	3.62319
							AVE	4.57561	4.97058	3.33333	3.52579
							SD	0.689463	0.405762	0.246375	0.168697
						4	Repetitions	W	W+DS	MT	MT+DS
							1	4.44758	5.16796	4.25806	4.80086
							2	3.40109	5.00125	4.25806	4.24691
							3	4.31677	5.25131	3.74194	3.96994
							AVE	4.05515	5.14017	4.08602	4.33924
							SD	0.570193	0.127326	0.297987	0.423082
						6	Repetitions	W	W+DS	MT	MT+DS
							1	5.53882	5.55849	4.03562	4.58404
							2	5.20649	5.93533	4.03562	4.75382
							3	5.31726	5.6527	4.17014	4.9236
							AVE	5.35419	5.71551	4.08046	4.75382
							SD	0.169214	0.196117	0.0776656	0.169779
					Explanation：This table is the raw data of MDA content determination. We set up three repetitions in each experiment to ensure the reliability of the results, and finally take the average as the final result.

## Sheet: α-amylase
						germination time/d		different treatments
						2	Repetitions	W	W+DS	MT	MT+DS
							1	0.712258	0.583277	0.672847	0.619355
							2	0.67643	0.533118	0.672847	0.637276
							3	0.708675	0.568946	0.680013	0.673118
							AVE	0.699121	0.561781	0.675235	0.64325
							SD	0.0197324	0.0258358	0.00413704	0.027375
						4	Repetitions	W	W+DS	MT	MT+DS
							1	0.71584	0.680013	0.733754	0.769582
							2	0.71584	0.697926	0.762417	0.719423
							3	0.701509	0.708675	0.762417	0.705092
							AVE	0.711063	0.695538	0.752862	0.731366
							SD	0.00827409	0.0144797	0.0165482	0.0338632
						6	Repetitions	W	W+DS	MT	MT+DS
							1	0.769582	0.609832	0.746308	0.719423
							2	0.719423	0.699618	0.767856	0.71584
							3	0.705092	0.70321	0.757082	0.694344
							AVE	0.731366	0.670887	0.757082	0.709869
							SD	0.0338632	0.0529057	0.0107744	0.0135642
						Explanation：This table is the raw data of α-amylase active determination. We set up three repetitions in each experiment to ensure the reliability of the results, and finally take the average as the final result.

## Sheet: Proline
					germination time/d		different treatments
					2	Repetitions	W	W+DS	MT	MT+DS
						1	204.315	221.371	207.581	237.702
						2	204.315	227.903	209.032	235.161
						3	206.129	219.194	203.226	243.145
						AVE	204.919	222.823	206.613	238.669
						SD	1.04761	4.53266	3.02177	4.07896
					4	Repetitions	W	W+DS	MT	MT+DS
						1	181.815	214.113	178.548	230.081
						2	177.823	210.847	181.815	234.435
						3	178.185	211.573	180.726	235.161
						AVE	179.274	212.177	180.363	233.226
						SD	2.20745	1.71501	1.66303	2.74786
					6	Repetitions	W	W+DS	MT	MT+DS
						1	238.427	283.79	242.056	291.048
						2	243.871	281.613	238.065	290.141
						3	247.5	276.895	248.589	287.056
						AVE	243.266	280.766	242.903	289.415
						SD	4.56643	3.52471	5.31295	2.0926
					Explanation：This table is the raw data of proline content determination. We set up three repetitions in each experiment to ensure the reliability of the results, and finally take the average as the final result.

## Sheet: soluble sugar
						germination time/d		different treatments
						2	Repetitions	W	W+DS	MT	MT+DS
							1	13.3709	16.875	15.1537	18.5041
							2	13.4324	17.2746	16.1066	17.9201
							3	13.3709	17.8586	15.4918	19.1803
							AVE	13.3914	17.3361	15.584	18.5348
							SD	0.0354928	0.494677	0.483081	0.630685
						4	Repetitions	W	W+DS	MT	MT+DS
							1	21.209	26.4857	22.1311	29.6107
							2	21.1066	27.6639	21.4139	28.9959
							3	22.3361	28.5861	22.9508	29.7643
							AVE	21.5505	27.5786	22.1653	29.457
							SD	0.682206	1.0528	0.769012	0.406622
						6	Repetitions	W	W+DS	MT	MT+DS
							1	15.3689	21.0041	19.5697	22.0287
							2	14.7541	21.6189	19.877	22.6434
							3	15.2664	19.877	18.75	22.1311
							AVE	15.1298	20.8333	19.3989	22.2678
							SD	0.32936	0.883369	0.582607	0.32936
						Explanation：This table is the raw data of soluble sugar content determination. We set up three repetitions in each experiment to ensure the reliability of the results, and finally take the average as the final result.

[truncated: 3 more sheets: soluble protein, ABA, GA]
